## Articles of interest in other COB journals

From *Journal of Cell Science*

### **Grainy head promotes expression of septate junction proteins and influences epithelial morphogenesis**

Maithreyi Narasimha, Anne Uv, Alena Krejci, Nicholas H. Brown and Sarah J. Bray

Narasimha, M. et al. 2008. *J. Cell Sci.* doi: 10.1242/jcs.019422

### **The dynamics of fluorescently labeled endogenous *gurken* mRNA in *Drosophila***

Angela M. Jaramillo, Timothy T. Weil, Joseph Goodhouse, Elizabeth R. Gavis and Trudi Schupbach

Jaramillo, A. M. et al. 2008. *J. Cell Sci.* doi: 10.1242/jcs.019091

### **Mechanism of *PHERES1* imprinting in *Arabidopsis***

Grigory Makarevich, Corina B. R. Villar, Aleksandra Erilova and Claudia Köhler

Makarevich, G. et al. 2008. *J. Cell Sci.* doi:10.1242/jcs.023077
